# Supplementary material
Source: PubMed Central journal article supplement (PMC4887159)
Supplement: JCI85309.sd.pdf [file JCI85309.sd.pdf]

## **Supplementary Materials:**

Supplementary Figure 1

Supplementary Figure 2

Supplementary Figure 3

Supplementary Figure 4

Supplementary Table 1

**Supplementary Fig. 1:** Manufacturing of CD19 CAR-T cells. A) The strategy for manufacturing of CD19 CAR-T cells using the CliniMACs is shown. The leukapheresis product is split into two aliquots. CD4<sup>+</sup> cells are selected from one of the aliquots using the CD4 CliniMACs reagent. CD8<sup>+</sup> T<sub>CM</sub> cells are enriched from the second aliquot by a two-step method involving depletion of CD4<sup>+</sup>, CD14<sup>+</sup> and CD45RA<sup>+</sup> cells followed by selection of CD62L<sup>+</sup> cells from the CD4<sup>+</sup>/CD14<sup>+</sup>/CD45RA<sup>+</sup>-depleted fraction. The selected CD4<sup>+</sup> cells and CD4<sup>-</sup>/CD14<sup>-</sup>/CD45RA<sup>-</sup>/CD62L<sup>+</sup> cells are separately stimulated with anti-CD3/CD28 paramagnetic beads, transduced with a lentiviral vector encoding the CD19 CAR transgene and EGFRt and expanded in vitro for 15 - 20 days before formulation in a CD4<sup>+</sup>/EGFRt<sup>+</sup>: CD8<sup>+</sup>/EGFRt<sup>+</sup> ratio of 1:1 for infusion. In some patients with severe lymphopenia or circulating blasts, CD8<sup>+</sup> cells were selected rather than CD8<sup>+</sup> T<sub>CM</sub> cells (not shown). B) Flow cytometry plots from a representative two-step CD8<sup>+</sup> T<sub>CM</sub> enrichment are shown, illustrating the isolation of the CD4<sup>-</sup>/CD14<sup>-</sup>/CD45RA<sup>-</sup>/CD62L<sup>+</sup> fraction that contains T<sub>CM</sub>-enriched CD3<sup>+</sup> cells and CD3<sup>-</sup> cells. C) The CD8<sup>+</sup> T<sub>CM</sub> enriched cell product contains CD3<sup>-</sup> myeloid cells (SS<sup>hi</sup>/CD13<sup>+</sup>/CD15<sup>+</sup>/CD16<sup>hi</sup>; top) and basophils (SS<sup>lo</sup>/CD13<sup>+</sup>/CD123<sup>+</sup>; bottom). D) Representative flow cytometry plots

show enrichment in EGFRt<sup>+</sup> CAR expression in transduced CD4<sup>+</sup> (top) and CD8<sup>+</sup> (bottom) T cells between LCL stimulation and product release. E) Data from all B-ALL patients (n = 27) showing enrichment of EGFRt<sup>+</sup> cells in transduced CD4<sup>+</sup> (left) and CD8<sup>+</sup> (right) T cells between LCL stimulation (pre-LCL) and product release.

**Supplementary Fig. 2:** Immunophenotype of infused EGFRt<sup>+</sup> CAR-T cells. A) Immunophenotype of CD4<sup>+</sup>/EGFRt<sup>+</sup> CAR-T cells. B) Immunophenotype of CD8<sup>+</sup>/EGFRt<sup>+</sup> CAR-T cells manufactured from bulk CD8<sup>+</sup> T cells or CD8<sup>+</sup> T<sub>CM</sub> cells.

**Supplementary Fig. 3:** Resolution of bulky extramedullary disease after therapy with a low dose of CAR-T cells manufactured from a defined T cell subset composition. PET-CT scans before and after CAR-T cell therapy are shown from 2 patients with extramedullary B-ALL who achieved CR after lymphodepletion chemotherapy and infusion of CAR-T cells at DL 1 (2 x 10<sup>5</sup> CAR-T cells/kg).

**Supplementary Fig. 4:** Immune responses directed against the CAR transgene products. A) Pre- and post-infusion PBMC were stimulated twice at weekly intervals with CD19 CAR-transduced autologous T cells. The capacity of the pre-infusion and post-infusion cultured to lyse CD19 CAR-transduced autologous T cells (black) and non-transduced autologous T cells (white) was evaluated by <sup>51</sup>chromium release assay. One representative patient of 5 is shown. B-C) The post-infusion T cell line from a patient that exhibited specific lysis of autologous CAR-T cells was stimulated with pools of overlapping peptides from the CAR construct, and peptide pools that induced IFN-γ

secretion higher than that induced by T cells alone in an ELISpot assay were identified. Peptides 51, 55, 59 and 60 are located within the murine scFv. D) Peptides in the murine scFv that are predicted with a percentile rank < 5% (IEDB Analysis Resource, <http://tools.immuneepitope.org/mhci>) to bind HLA molecules expressed by the patient's CAR-T cells are indicated. Lower percentile scores indicate stronger binding.

**Supplementary Table 1:**

Patients treated with CAR-T cells at DL 1 or 2 who received dexamethasone with or without tocilizumab for CRS and neurotoxicity.

SUPPLEMENTARY FIGURE 1

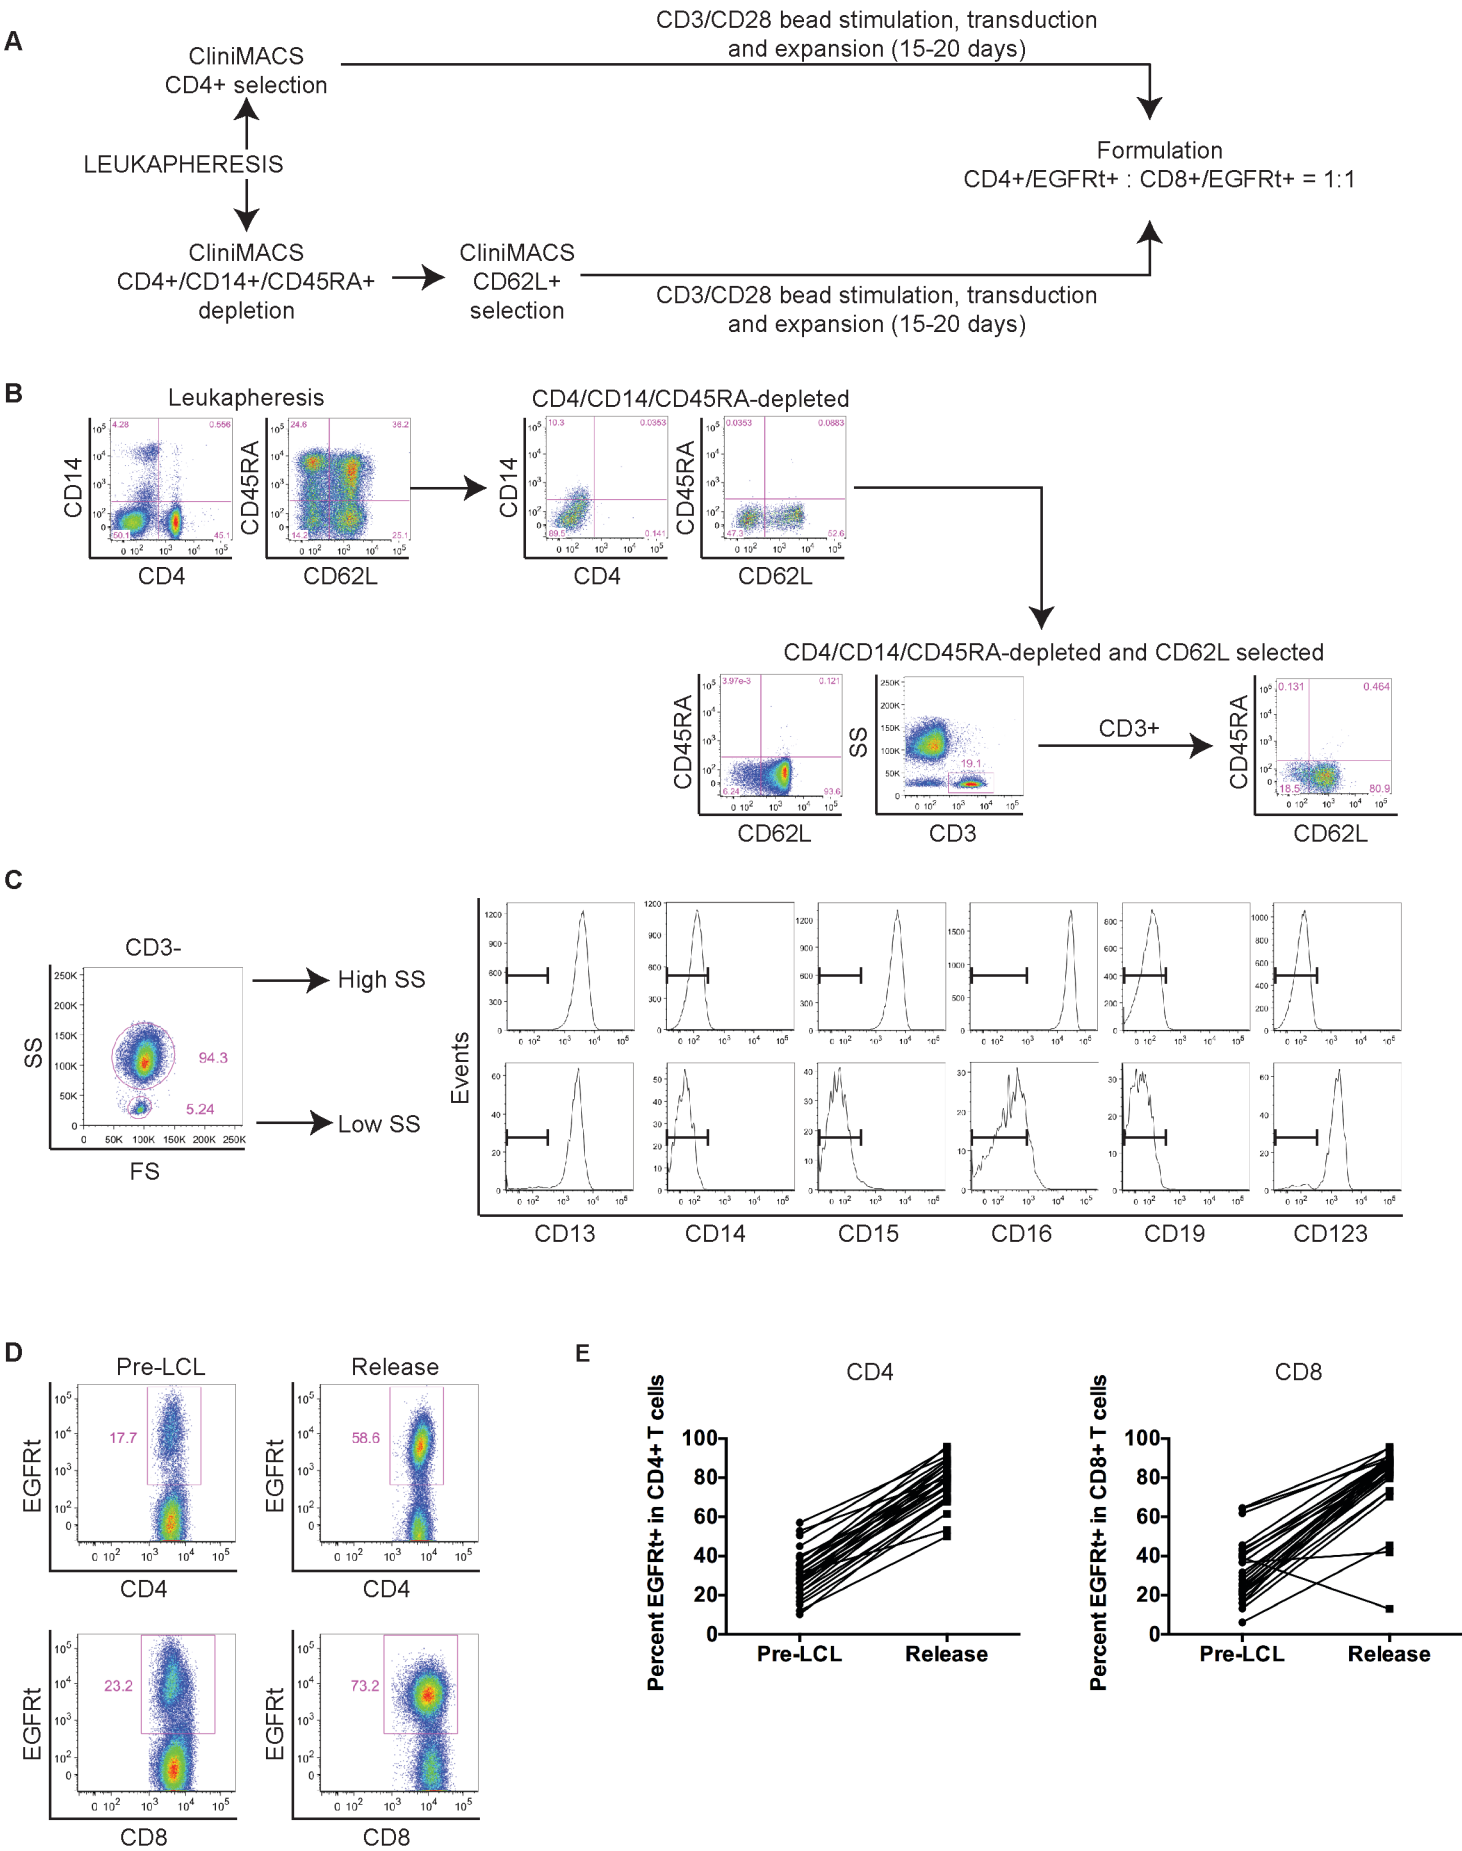

SUPPLEMENTARY FIGURE 2

A

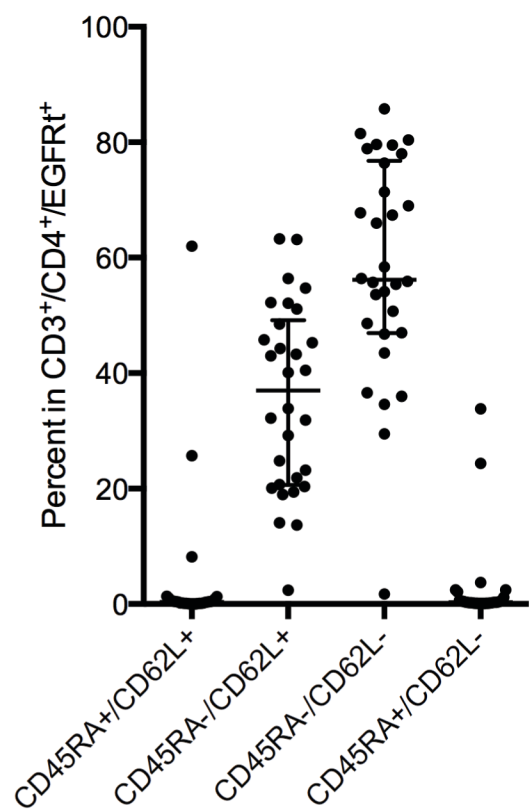

B

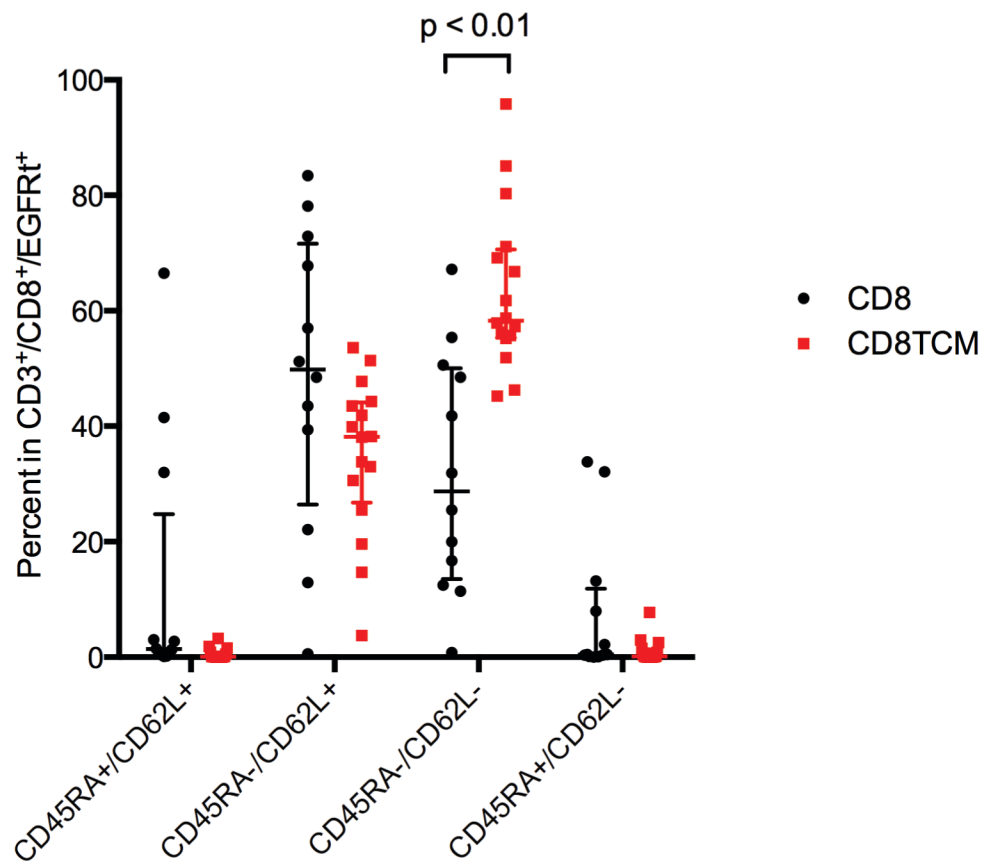

SUPPLEMENTARY FIGURE 3

Patient 1:  
Bilateral renal  
and bone  
infiltration

Day -6 before  
 $2 \times 10^5$  CAR-T cells/kg

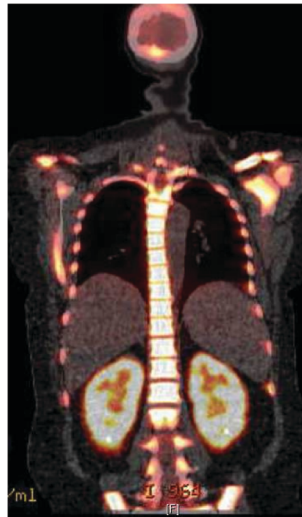

Day 37 after  
 $2 \times 10^5$  CAR-T cells/kg

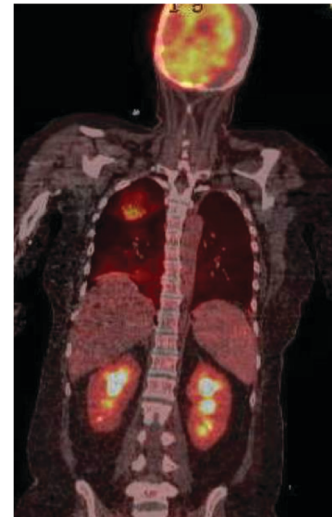

Patient 2:  
Retroperitoneal,  
para-aortic, and right  
iliac lymphadenopathy  
and right scapular  
infiltration

Day -6 before  
 $2 \times 10^5$  CAR-T cells/kg

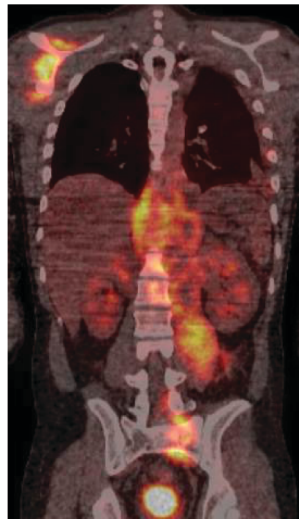

Day 31 after  
 $2 \times 10^5$  CAR-T cells/kg

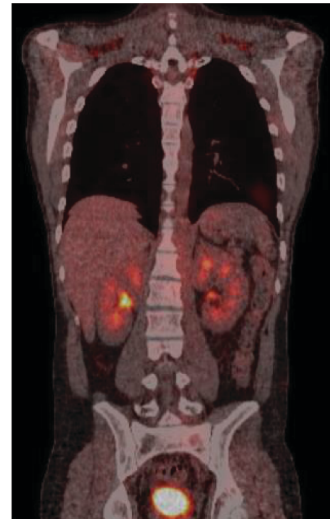

SUPPLEMENTARY FIGURE 4

A

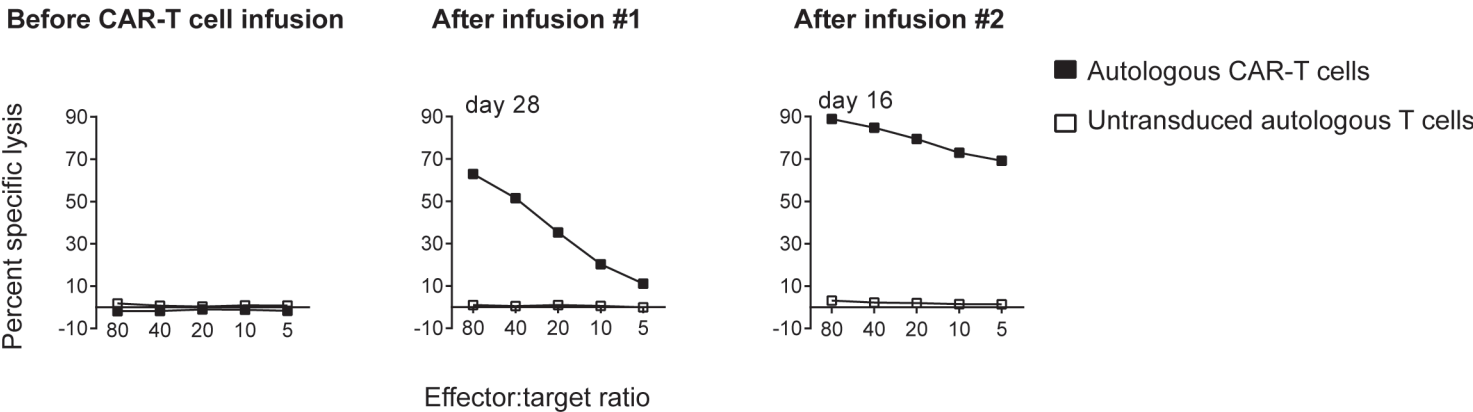

B

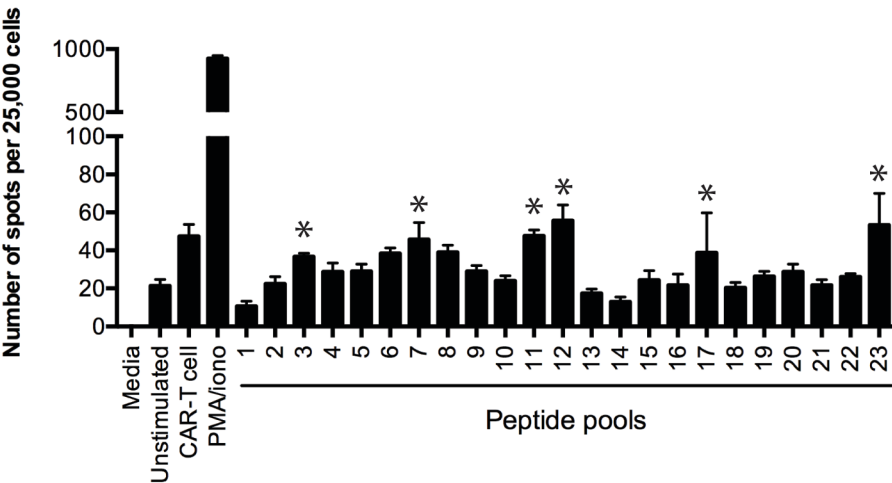

C

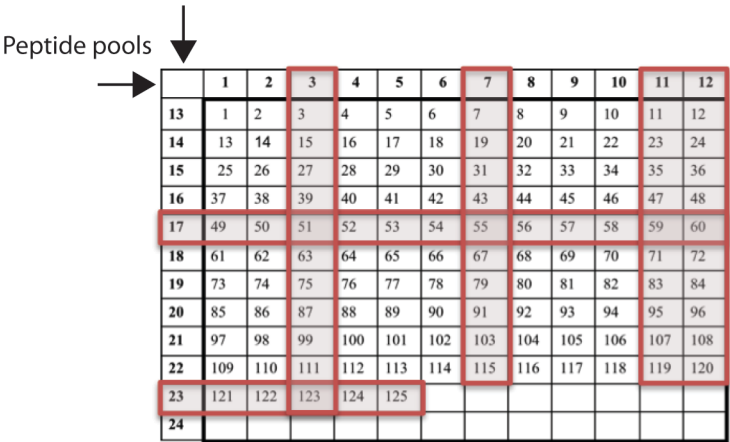

D

| HLA allele | Sequence    | Percentile |
|------------|-------------|------------|
| HLA-A*3002 | IYYCAKHYYY  | 0.15       |
|            | AIYYCAKHYY  | 0.3        |
|            | IYYCAKHYY   | 0.55       |
|            | AIYYCAKHYY  | 1          |
|            | YYCAKHYYY   | 1.3        |
|            | QTDDTAIYY   | 2.2        |
|            | TAIYYCAKHYY | 3.3        |
| HLA-A*3010 | AIYYCAKHYY  | 0.3        |
|            | AIYYCAKHYY  | 0.6        |
|            | IYYCAKHYY   | 0.8        |
|            | IYYCAKHYYY  | 0.8        |
|            | YYCAKHYYY   | 1.1        |
|            | TAIYYCAKHYY | 1.9        |
|            | QTDDTAIYY   | 2.7        |
|            | TTYNSALK    | 4.8        |

## SUPPLEMENTARY TABLE 1

| Patient number | Fever > 38.3 C (days after CAR-T cell infusion) | Pressor support (days after CAR-T cell infusion) | Intubated (days after CAR-T cell infusion) | Neurotoxicity                             |                | Therapy  |                                                            |                                                          |             |
|----------------|-------------------------------------------------|--------------------------------------------------|--------------------------------------------|-------------------------------------------|----------------|----------|------------------------------------------------------------|----------------------------------------------------------|-------------|
|                |                                                 |                                                  |                                            | Duration (days after CAR-T cell infusion) | Maximum grade* | ICU care | Tocilizumab (4-8 mg/kg IV; days after CAR-T cell infusion) | Dexamethasone (10 mg IV; days after CAR-T cell infusion) |             |
|                |                                                 |                                                  |                                            |                                           |                |          |                                                            | Days                                                     | Total doses |
| 7              | 9-11                                            | 11-15                                            | NA                                         | 11-16                                     | 3              | Yes      | 11                                                         | 12,13                                                    | 2           |
| 8              | 1-9,11-16,18,21                                 | NA                                               | NA                                         | 7-29                                      | 3              | No       | NA                                                         | 7,9                                                      | 2           |
| 12             | 3-7                                             | 6-7                                              | NA                                         | 6-13                                      | 3              | Yes      | 7                                                          | 7                                                        | 1           |
| 15             | 0-6                                             | NA                                               | NA                                         | 1-10                                      | 4              | Yes      | 6                                                          | 4,6,7,9                                                  | 4           |
| 16             | 1-7                                             | NA                                               | NA                                         | 8-11                                      | 4              | Yes      | NA                                                         | 8                                                        | 2           |
| 17             | 0-6                                             | 5-8, 10-13                                       | 10-15                                      | 10-122¶¶                                  | 5              | Yes      | 6                                                          | 6,10-20                                                  | 21          |
| 19             | 1-5                                             | 5                                                | 6-17                                       | 5-27                                      | 4              | Yes      | 5,7                                                        | 5-16                                                     | 28          |
| 26             | 1-5                                             | NA                                               | NA                                         | 6-12                                      | 3              | No       | NA                                                         | 6,7                                                      | 3           |
| 27             | 4-6                                             | NA                                               | NA                                         | 5-8                                       | 3              | No       | 6                                                          | 6,7                                                      | 3           |
| 28             | 5-7                                             | NA                                               | NA                                         | 9-12                                      | 3              | No       | 7                                                          | 12,13                                                    | 4           |

\*NCI CTCAEv4.03

¶¶ Died on day 122 in CR with persistent neurotoxicity
